# Supplementary material for: Synthesis of copolymer derived from tamarind kernel polysaccharide (TKP) and poly(methacrylic acid) via SI-ATRP with enhanced pH triggered dye removal
Source: Royal Society of Chemistry journal article supplement (doi:10.1039/c5ra23579k), 2015-12-22
Supplement: c5ra23579k1.pdf [file c5ra23579k1.pdf]

**Supporting Information**

**For**

**Synthesis of copolymer derived from tamarind kernel polysaccharide (TKP) and *poly*  
(methacrylic acid) via SI-ATRP with enhanced pH triggered dye removal**

*Aniruddha Pal, Sagar Pal\**

Polymer Chemistry Laboratory, Department of Applied Chemistry, Indian School of Mines,  
Dhanbad-826004, India

**19 February 2018**

**Note added after first publication:** This Supplementary Information file replaces that originally published on 22 December 2015, in which an incorrect image was included in Fig. S5.

\* Corresponding Author: Tel: +91-326-2235769; Fax: 0091-326-2296615

E-mail: [sagarpall@hotmail.com](mailto:sagarpall@hotmail.com)

**AFM analysis:**

Sectional analysis and the roughness measurements were performed over the entire scan size of 10µm×10µm, using AFM instrument (Bruker Dimension Icon Nanoscope V, Germany). The root mean square (*r.m.s*) roughness represents the standard deviation of the heights in the topographical image and was calculated using eq. (1)

$$r.m.s\ roughness = \sqrt{\frac{1}{n-1} \sum_{\text{sectional}} (Z_i - Z_{\text{average}})^2} \dots \dots \dots \text{eq. (1)}$$

Where  $Z_i$  is the height value at the  $i$  point in the image,  $n$  is the number of points in the image and  $Z_{\text{average}}$  is the average height calculated by eq. (2)

$$Z_{\text{average}} = \frac{1}{n} \sum_{\text{Sectional}} Z_i \dots \dots \dots \text{eq (2)}$$

**Investigation of rheological characteristics:**

The rheological characteristics were examined in the laboratory using Bohlin Gemini-2 Rheometer (Malvern, UK). The system temperature was controlled at 30 °C throughout the experiments. The aqueous solutions of 1-wt % TKP and various grades of g-TKP/pMA were prepared using pH 7.4 buffer solution. The storage modulus ( $G'$ ) and loss modulus ( $G''$ ) were measured at a constant frequency of 0.25 Hz and different shear stress ranging from 0 to 500 Pa. Frequency sweep measurements were carried out in the frequency range from 0.1 to 10 Hz at a constant stress of 1 Pa. Similarly, Shear viscosity was evaluated at different shear rates regions.

**Adsorption Experiments:**

In the present study 1000 mg. L-1 stock solutions of different dyes (MB, Safranin, EBT and MO) were prepared individually. Thermostated orbital shaker (Rivotek, Kolkata, India) was used to perform the batch experiments. The experimental parameters such as solution pH, initial

concentration of dyes, contact time, agitation speed, adsorbent dose and temperature were varied to optimize the adsorption condition.

In all batch experiments, required amount of adsorbent was mixed with 25mL of the dye solutions and then the flasks were shaken for desired time at particular temperature. After the filtration, (with the help of 0.42 μm filter paper), the concentration of the dye solutions were analyzed by UV-Vis spectrophotometer (Make: Shimadzu, Japan: Model: UV 1800).

The % of adsorption as well as equilibrium uptake was determined using eq. (3) and eq. (4) respectively

$$\text{Adsorption} = \frac{C_0 - C_e}{C_0} \times 100 \dots \dots \dots \text{eq. (3)}$$

$$q_e = (C_0 - C_e) \times \frac{V}{W} \dots \dots \dots \text{eq. (4)}$$

Where  $q_e$  is the equilibrium capacity of dyes on adsorbent (mg. g<sup>-1</sup>),  $C_0$  and  $C_e$  are the initial and equilibrium concentration of the dyes (mg L<sup>-1</sup>), respectively.  $V$  is the volume of dye solution used (L) and  $W$  is the weight of the adsorbent (g) utilized.

**Desorption experiments:**

To determine the reusability of g-TKP/pMA as adsorbent, three successive adsorption-desorption experiments were carried out with 400 mg.L<sup>-1</sup> of MB, 300 mg, L<sup>-1</sup> of Safranin, 350 mg, L<sup>-1</sup> of EBT and 300 mg, L<sup>-1</sup> of MO dye solutions. The dye loaded samples were separated by filtration and the samples were dried completely and used for desorption study. To determine the reusability of the sorbents, consecutive adsorption-desorption cycles were repeated three times with pH 2, 7 and 9.

The % desorption was calculated eq. (5):

$$\% \text{ Desorption} = \frac{\text{Concentration desorbed (mg/L)}}{\text{Concentration adsorbed (mg/L)}} \times 100 \dots \dots \dots \text{eq. (5)}$$

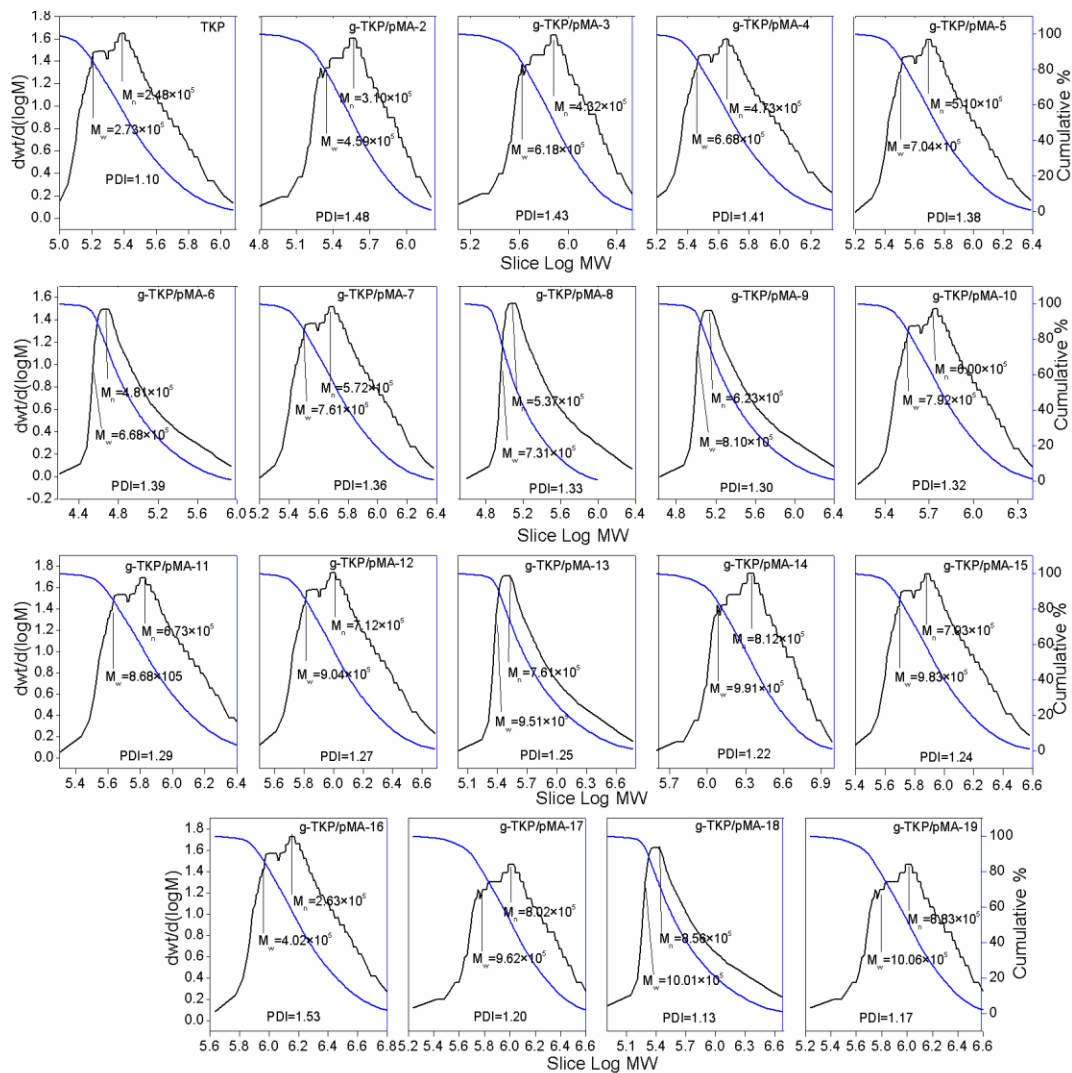

Fig. S1: GPC analysis result

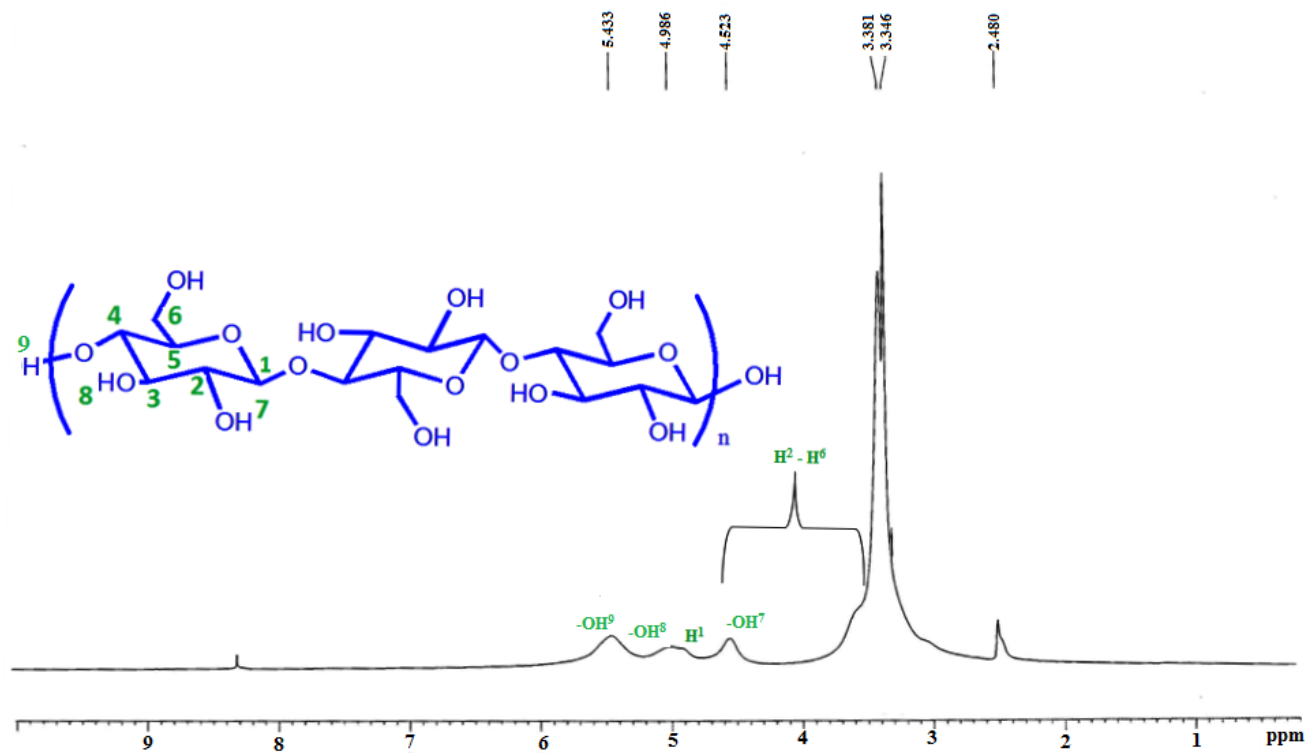

**Fig. S2:** <sup>1</sup>H NMR spectrum of TKP

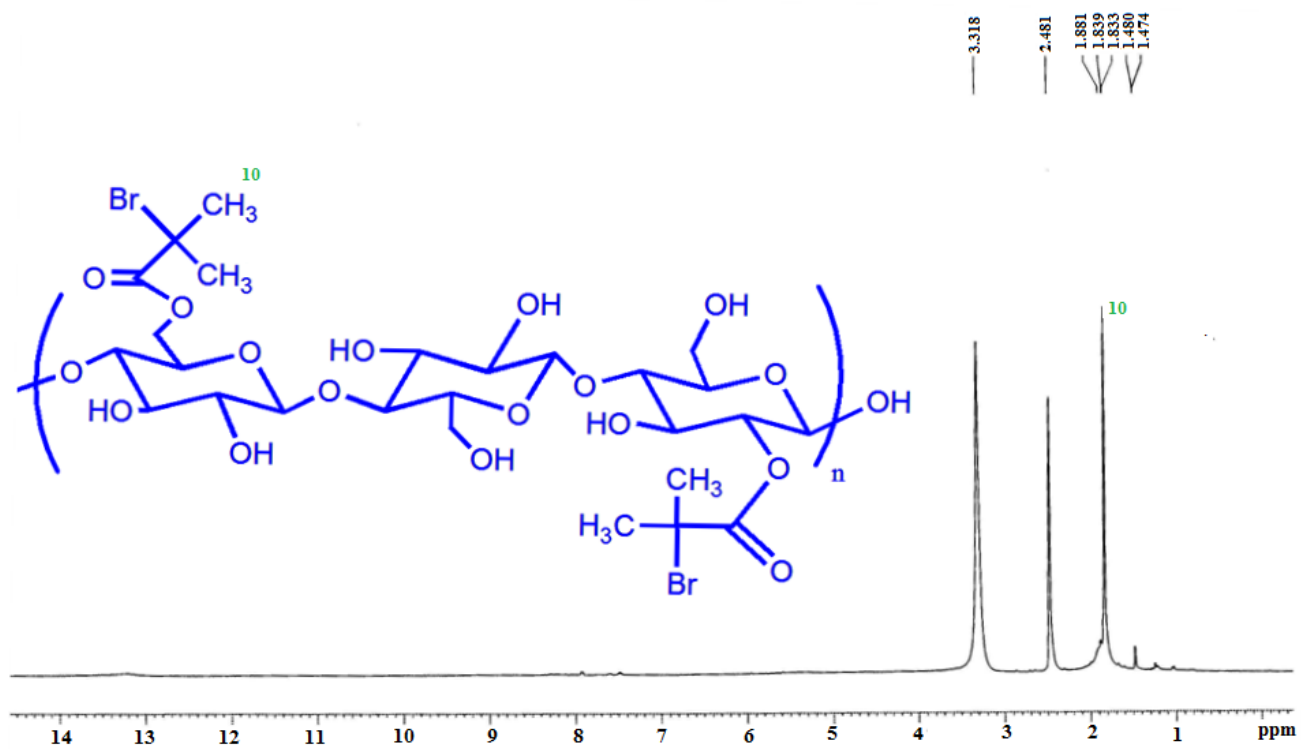

**Fig. S3:** <sup>1</sup>H NMR spectrum of TKP-Br

**Table S1.** Elemental analysis results

| Sample       | % C   | % H  | % N  | % O  | % S  |
|--------------|-------|------|------|------|------|
| TKP          | 40.03 | 7.42 | 0.41 | 52.1 | 0.00 |
| g-TKP/pMA-18 | 35.16 | 6.12 | 0.14 | 58.5 | 0.00 |

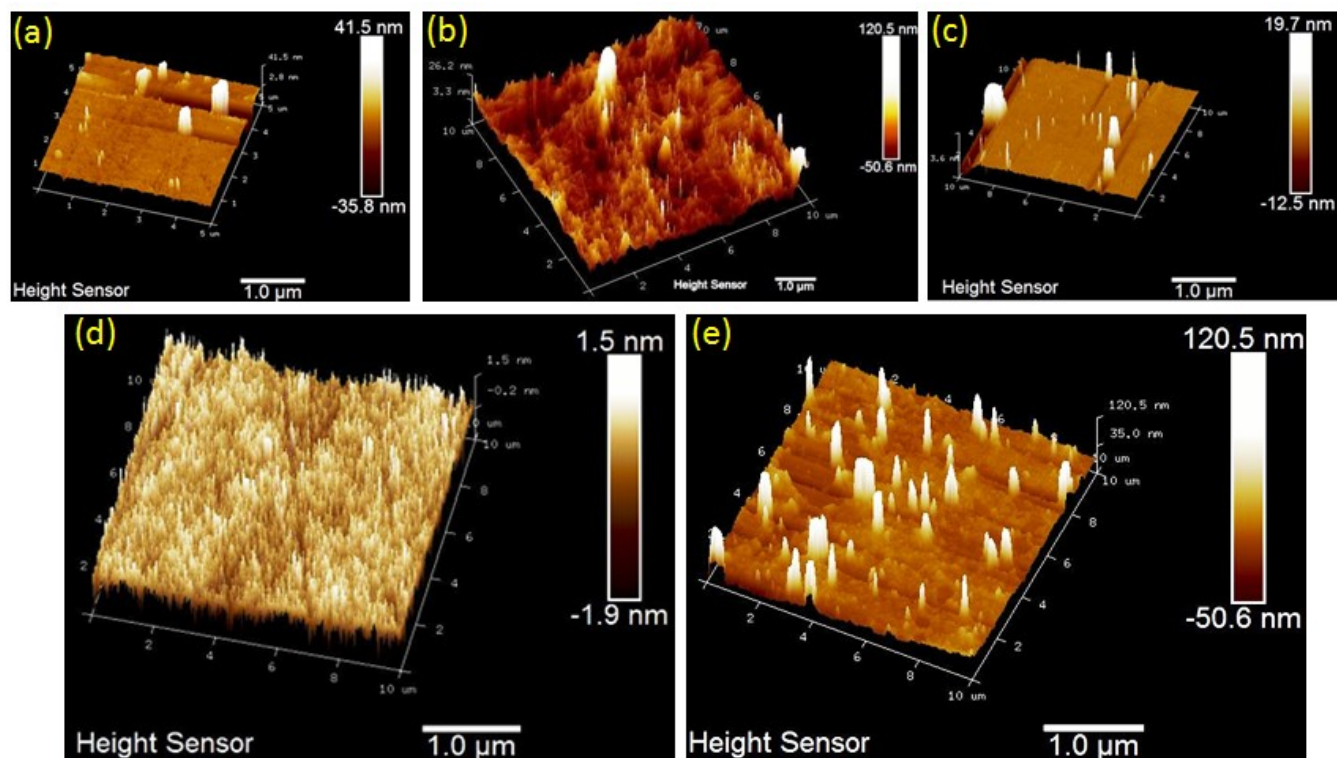

**Fig. S4:** AFM analysis of (a) TKP (b) TKP-Br (c) g-TKP/pMA (d) MB loaded g-TKP/pMA and (e) EBT loaded g-TKP/pMA



**Table S2.** Sectional analysis of (a) TKP (b) TKP-Br (c) g-TKP/pMA and (d) MB loaded g-TKP/pMA (e) EBT loaded g-TKP/pMA

(a)

| Pair | Horizontal Distance | Vertical Distance | Surface Distance | Angle                | Rmax    | Rz      | Rz Count | Rms     | Ra (Freq. Cut Off) | Freq. Cut Off | Radius        | Radius Sigma |
|------|---------------------|-------------------|------------------|----------------------|---------|---------|----------|---------|--------------------|---------------|---------------|--------------|
| 1    | 0.67 $\mu$ m        | -1.467nm          | 0.069 $\mu$ m    | -1.163( $^{\circ}$ ) | 1.749nm | 0.000nm | 0.000    | 6.645nm | 0.517nm            | 6.645 $\mu$ m | 2.900 $\mu$ m | 0.000nm      |
| 0    | 0.000 $\mu$ m       | 0.000nm           | 0.000 $\mu$ m    | 0.000( $^{\circ}$ )  | 0.000nm | 0.000nm | 0.000    | 0.000nm | 0.000nm            | 0.000 $\mu$ m | 0.000 $\mu$ m | 0.000nm      |
| 0    | 0.000 $\mu$ m       | 0.000nm           | 0.000 $\mu$ m    | 0.000( $^{\circ}$ )  | 0.000nm | 0.000nm | 0.000    | 0.000nm | 0.000nm            | 0.000 $\mu$ m | 0.000 $\mu$ m | 0.000nm      |

(b)

| Pair | Horizontal Distance | Vertical Distance | Surface Distance | Angle                | Rmax      | Rz       | Rz Count | Rms      | Ra (Freq. Cut Off) | Frequency Cut Off | Radius        | Radius Sigma |
|------|---------------------|-------------------|------------------|----------------------|-----------|----------|----------|----------|--------------------|-------------------|---------------|--------------|
| 1    | 0.265 $\mu$ m       | 13.303nm          | 0.019 $\mu$ m    | 2.073( $^{\circ}$ )  | 34.214.nm | 0.000nm  | 0.000    | 57.325nm | 52.075nm           | 0.000 $\mu$ m     | 0.492 $\mu$ m | 0.006nm      |
| 2    | 0.112 $\mu$ m       | 69.206nm          | 0.146 $\mu$ m    | 35.23( $^{\circ}$ )  | 61.017nm  | 0.000nm  | 0.000    | 5.957nm  | 45.563nm           | 0.000 $\mu$ m     | 0.158 $\mu$ m | 0.009nm      |
| 3    | 0.378 $\mu$ m       | -4.368nm          | 0.208 $\mu$ m    | -0.401( $^{\circ}$ ) | 59.445nm  | 43.424nm | 1.900    | 0.000nm  | 18.747nm           | 0.000 $\mu$ m     | 0.346 $\mu$ m | 0.002nm      |

(c)

| Pair | Horizontal Distance | Vertical Distance | Surface Distance | Angle                | Rmax      | Rz       | Rz Count | Rms      | Ra (Freq. Cut Off) | Frequency Cut Off | Radius        | Radius Sigma |
|------|---------------------|-------------------|------------------|----------------------|-----------|----------|----------|----------|--------------------|-------------------|---------------|--------------|
| 1    | 1.440 $\mu$ m       | -2.035nm          | 1.176 $\mu$ m    | -0.075( $^{\circ}$ ) | 81.386.nm | 85.541nm | 1.780    | 41.413nm | 29.074nm           | 0.000 $\mu$ m     | 2.279 $\mu$ m | 0.011nm      |
| 2    | 0.569 $\mu$ m       | 74.720nm          | 0.667 $\mu$ m    | 6.176( $^{\circ}$ )  | 72.652nm  | 0.000nm  | 0.000    | 3.777nm  | 22.472nm           | 0.000 $\mu$ m     | 2.034 $\mu$ m | 0.002nm      |
| 0    | 0.000 $\mu$ m       | 0.000nm           | 0.000 $\mu$ m    | 0.000( $^{\circ}$ )  | 0.000nm   | 0.000nm  | 1.070    | 0.000nm  | 0.000nm            | 0.000 $\mu$ m     | 0.000 $\mu$ m | 0.000nm      |

(d)

| Pair | Horizontal Distance | Vertical Distance | Surface Distance | Angle               | Rmax      | Rz       | Rz Count | Rms      | Ra (Freq. Cut Off) | Freq. Cut Off | Radius        | Radius Sigma |
|------|---------------------|-------------------|------------------|---------------------|-----------|----------|----------|----------|--------------------|---------------|---------------|--------------|
| 1    | 1.123 $\mu$ m       | 2.987nm           | 1.252 $\mu$ m    | 0.126( $^{\circ}$ ) | 123.88.nm | 129.88nm | 1.098    | 46.700nm | 42.700nm           | 0.000 $\mu$ m | 1.275 $\mu$ m | 0.013nm      |
| 2    | 0.169 $\mu$ m       | 121.57nm          | 0.218 $\mu$ m    | 29.65( $^{\circ}$ ) | 72.942nm  | 0.000nm  | 0.000    | 6.089nm  | 5.089nm            | 0.728 $\mu$ m | 0.256 $\mu$ m | 0.051nm      |
| 0    | 0.000 $\mu$ m       | 0.000nm           | 0.000 $\mu$ m    | 0.000( $^{\circ}$ ) | 0.000nm   | 0.000nm  | 2.120    | 0.000nm  | 0.000nm            | 0.000 $\mu$ m | 0.000 $\mu$ m | 0.000nm      |

(e)

| Pair | Horizontal Distance | Vertical Distance | Surface Distance | Angle               | Rmax      | Rz       | Rz Count | Rms      | Ra (Freq. Cut Off) | Freq. Cut Off | Radius        | Radius Sigma |
|------|---------------------|-------------------|------------------|---------------------|-----------|----------|----------|----------|--------------------|---------------|---------------|--------------|
| 1    | 1.113 $\mu$ m       | 2.787nm           | 1.552 $\mu$ m    | 0.126( $^{\circ}$ ) | 126.84.nm | 139.88nm | 1.196    | 49.524nm | 45.700nm           | 0.000 $\mu$ m | 1.295 $\mu$ m | 0.014nm      |
| 2    | 0.159 $\mu$ m       | 111.27nm          | 0.248 $\mu$ m    | 31.65( $^{\circ}$ ) | 72.742nm  | 0.000nm  | 0.000    | 6.129nm  | 5.119nm            | 0.788 $\mu$ m | 0.266 $\mu$ m | 0.061nm      |
| 0    | 0.000 $\mu$ m       | 0.000nm           | 0.000 $\mu$ m    | 0.000( $^{\circ}$ ) | 0.000nm   | 0.000nm  | 2.130    | 0.000nm  | 0.000nm            | 0.000 $\mu$ m | 0.000 $\mu$ m | 0.000nm      |

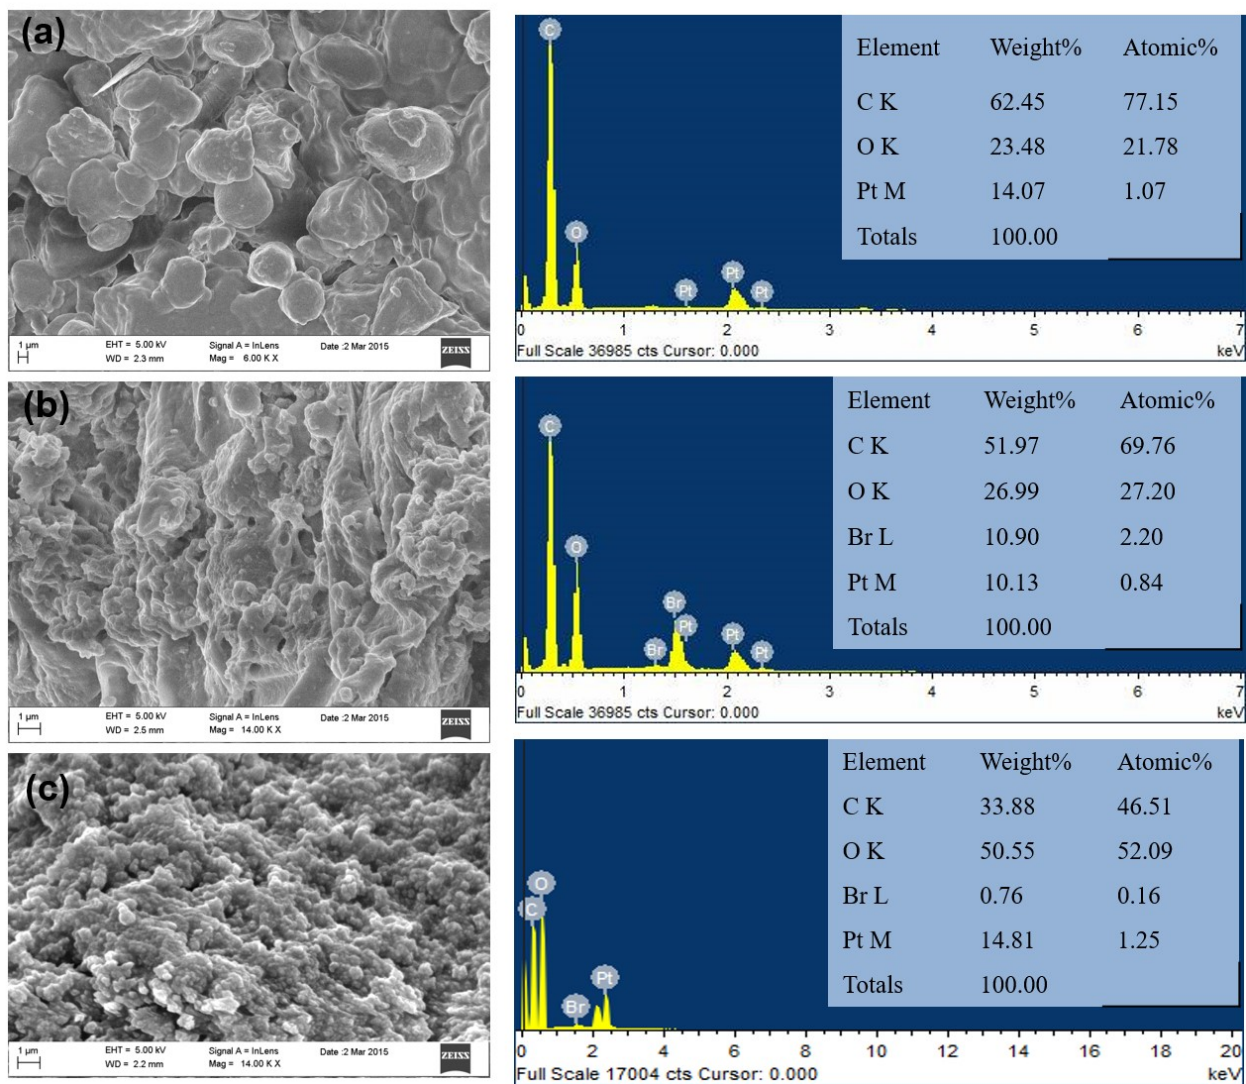

**Fig. S5.** FESEM and EDAX analysis of (a) TKP, (b) macro initiator, and (c) g-TKP/pMA-18.

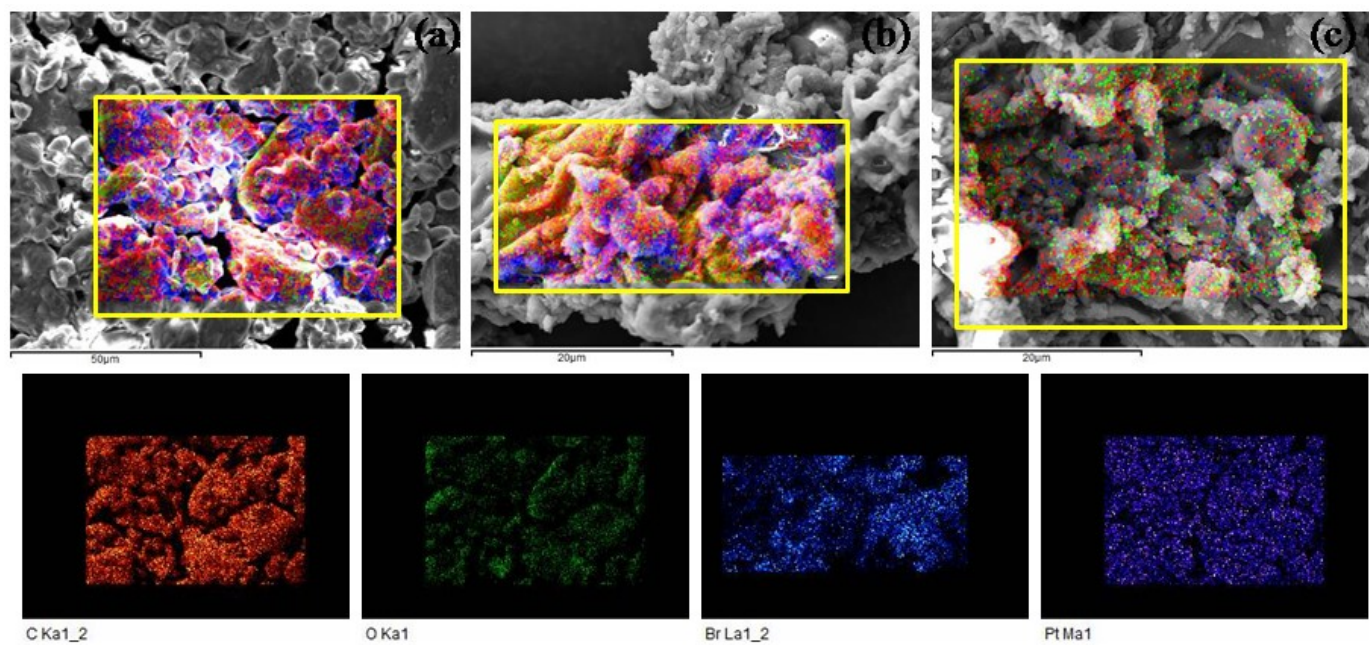

**Fig. S6.** Elemental mapping of (a) TKP (b) TKP-Br (c) g-TKP/pMA.

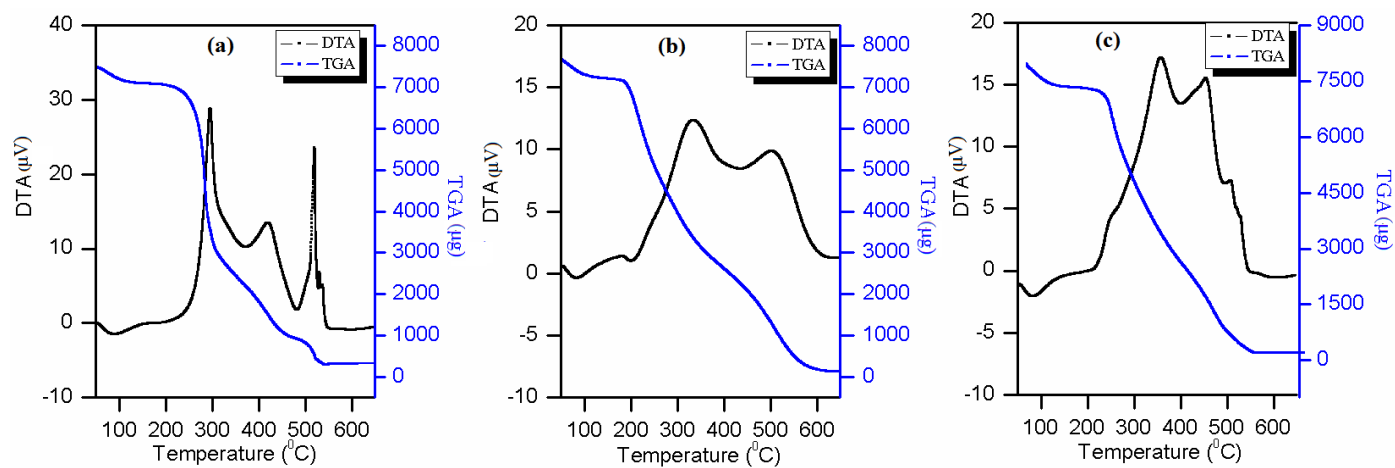

**Fig. S7.** Thermogravimetric analysis of (a) TKP (B) TKP-Br and (c) g-TKP/pMA

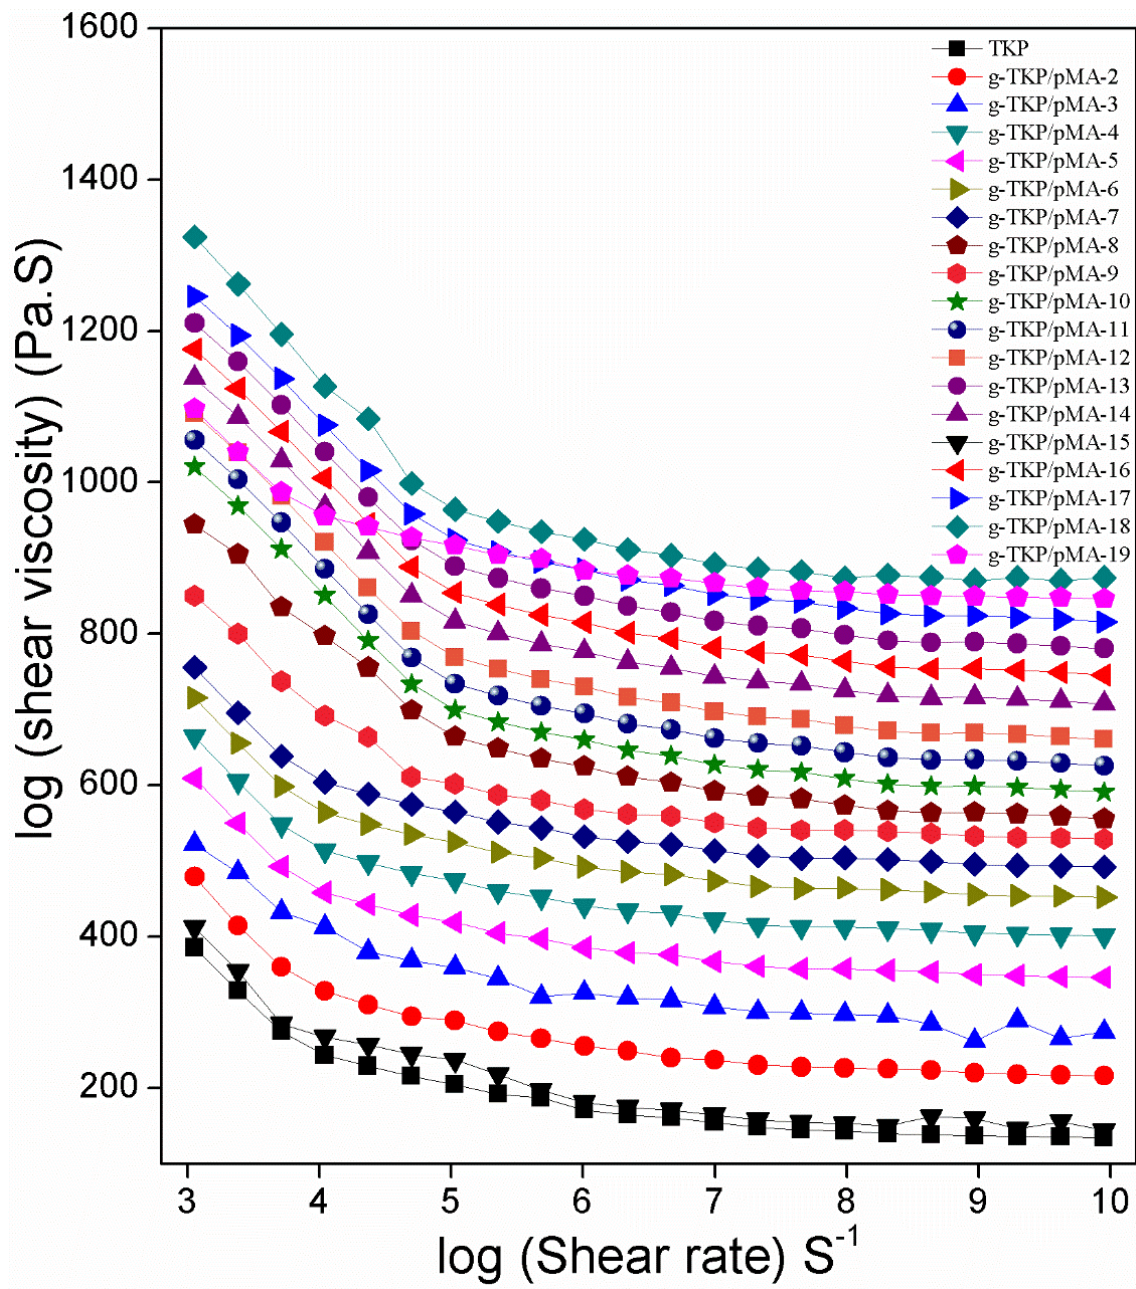

Fig. S8. Shear viscosity vs. shear rate curve of TKP and various g-TKP/pMA.

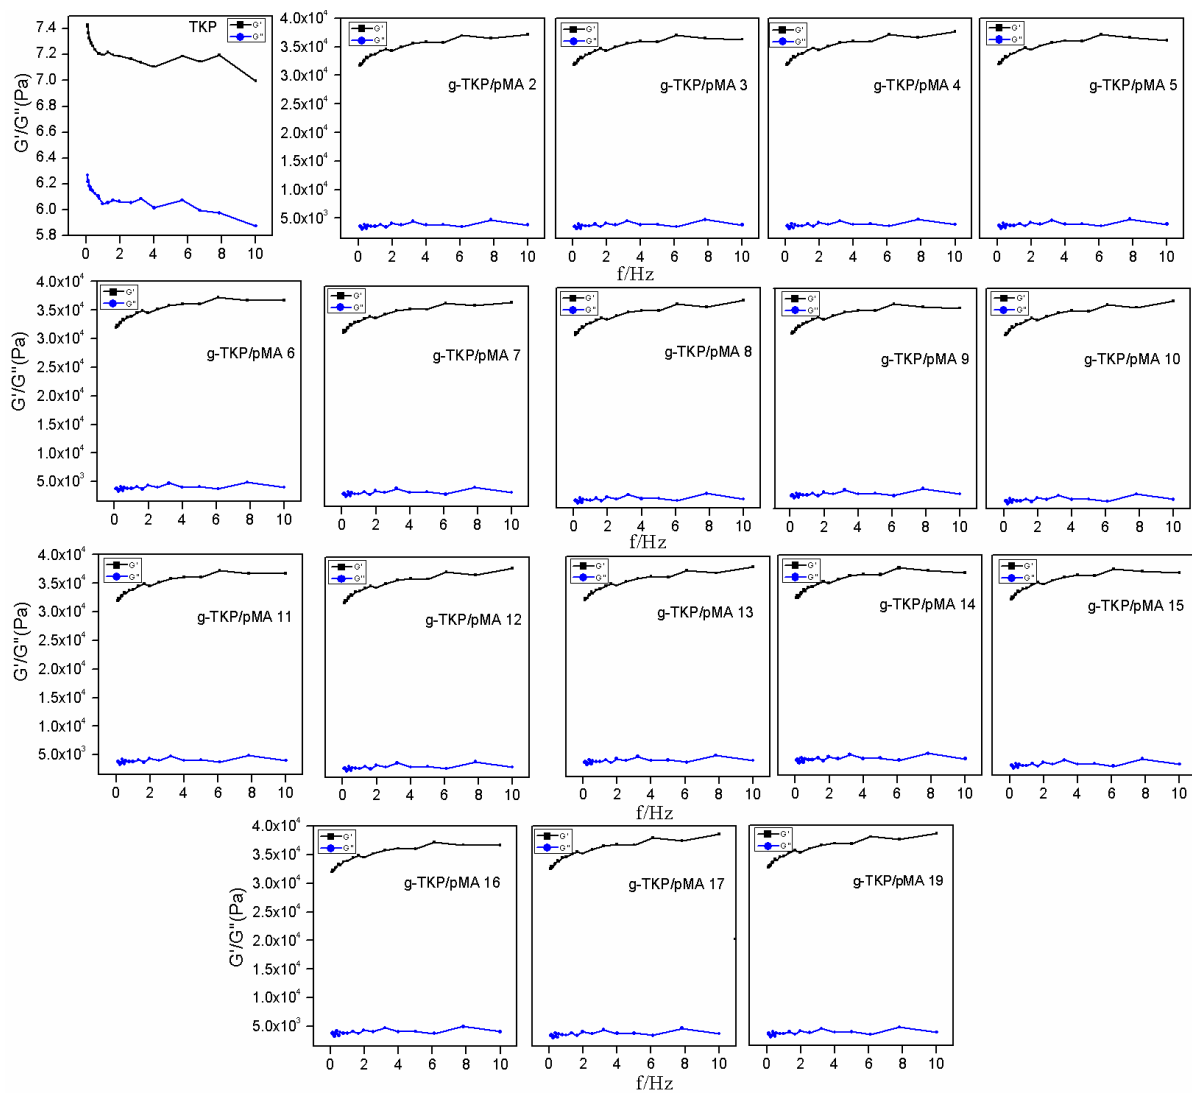

**Fig. S9:**  $G'/G''$  vs. frequency curve for TKP and various g-TKP/pMA.

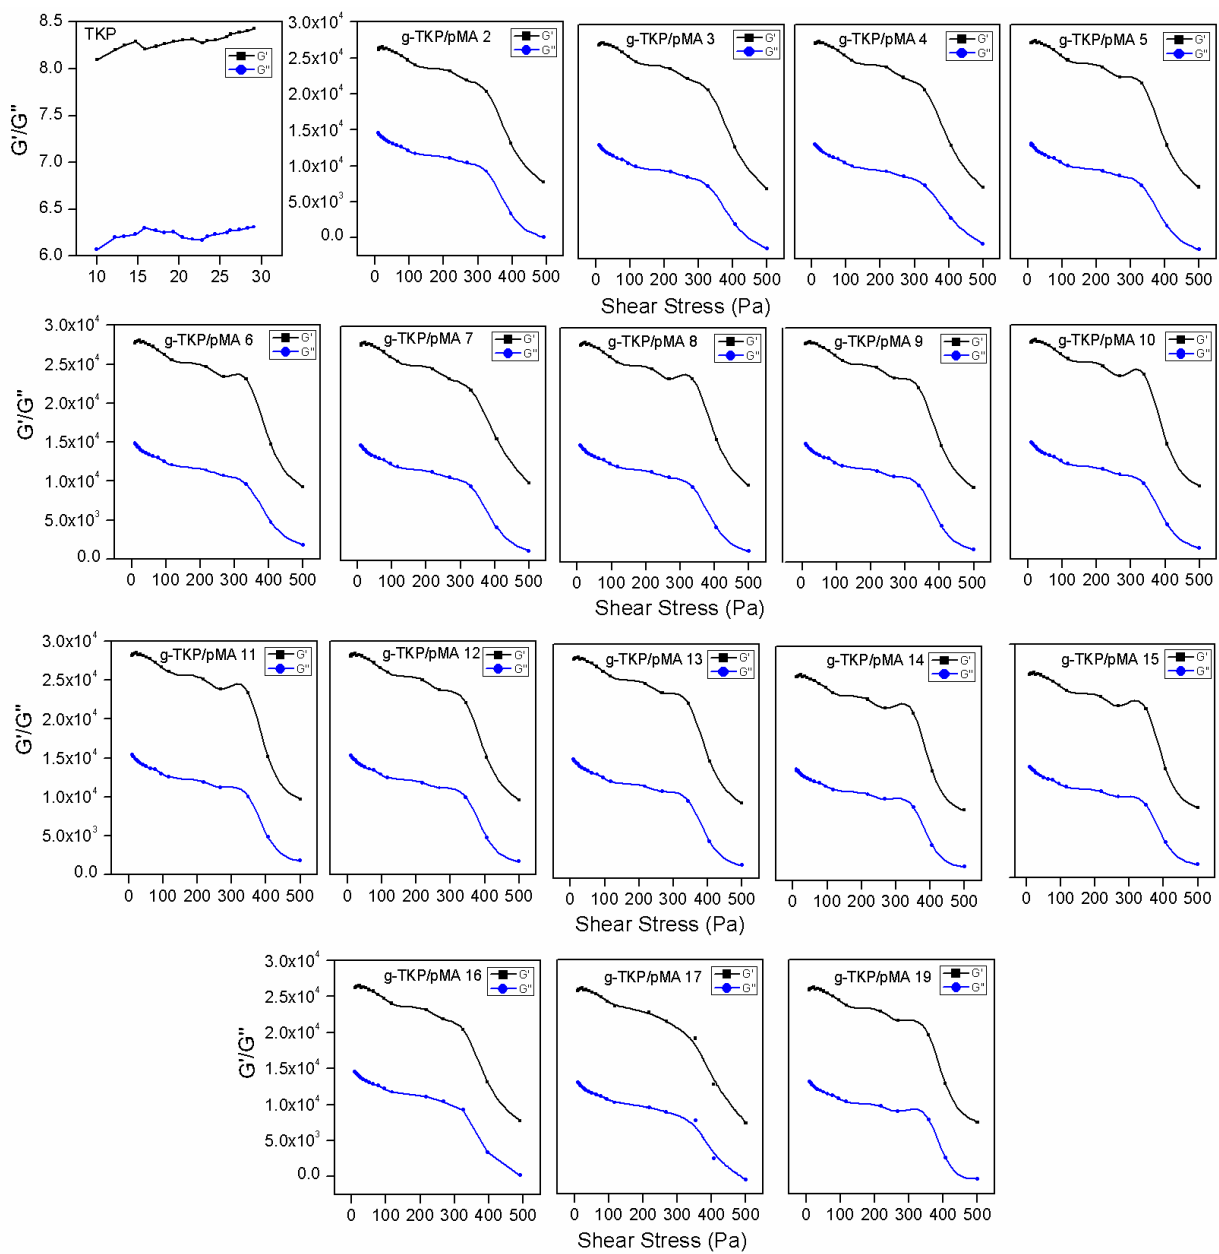

**Fig. S10:**  $G'/G''$  vs. shear stress curve for TKP and various g-TKP/pMA.

## **Effect of parameters on % adsorption of dyes:**

### *Effect of dye concentration:*

The initial concentration of adsorbate gives a significant driving force to defeat all mass transfer resistances of the dyes between the solid and aqueous phases. Fig. S11a suggests that initially adsorption efficiency was increased upto fixed dosages of dyes concentration, beyond which it was declined. At lower concentrations, all adsorbate ions present in the adsorption medium could react with the binding sites, hence higher % adsorption occurs. At higher concentrations, due to the saturation of the sorption sites, the % uptake of the dyes by the g-TKP/pMA showed a decreasing trend.<sup>1</sup>

### *Effect of contact time:*

Fig. S11b represents that efficiency of the dyes adsorption was increased gradually with time and reached maximum at 25 min (MB), 35 min (Safranin), 30 min (EBT), and 35 min (MO) respectively. This is due to the accessibility of a large number of adsorption sites.<sup>2</sup> Initially the dyes are adsorbed on the surface of adsorbent through Vander Waal's force of attraction followed by the electrostatic attraction or sharing of lone pair of electrons between the adsorbent and adsorbate molecules.<sup>2</sup> After maximum removal, the rate of dyes uptake was controlled by the rate of dyes transport from external to internal pores of the graft copolymer.<sup>2</sup>

### *Effect of polymer dosage:*

The effect of g-TKP/pMA dosage on uptake of dyes from aqueous solution (Fig. S11c) displays that maximum removal took place at 45mg/25 mL for MB and Safranin and 50 mg/25 mL for EBT and MO. This is due to the higher availability of adsorption sites on adsorbent surface, which creates the overcrowding of adsorption sites.<sup>1</sup>



*Effect of temperature:*

With increase in temperature from 25 °C to 35 °C for MB and Safranin, the Adsorption capacity gradually increased and it goes upto 99.07 % and 96.34 %, but 97.67 % and 89.45 % for EBT and MO at 40°C respectively (Fig. S11d) and beyond this it was declined. This is mainly due to the swelling effect of the synthesized polymer which enhanced the adsorption efficiency.<sup>3</sup> Also with the increase in temperature, the mobility of dyes molecules were increased which provides sufficient driving force to overcome mass transfer resistance of the dyes ions between aqueous and surface phase of the polymer.<sup>4</sup> But after certain temperature, the Adsorption efficiency was decreased, due to weakening of adsorption forces between the active sites of the polymer and dyes and also between the adjacent molecules of the adsorbed phase.<sup>5</sup>

*Effect of agitation speed:*

The effect of agitation speed on adsorption performance of dyes using g-TKP/pMA-18 has been studied and found that the highest adsorption was occurred at 100 rpm (MB, Safranin and MO) and 120 (EBT). Initially with increase in agitation speed, the diffusion rate of the dyes became higher because of the enhancement of turbulence, resulting higher adsorption efficacy and after the certain speed, desorption may predominant owing to the reverse effect<sup>2</sup> (Fig. S11e).

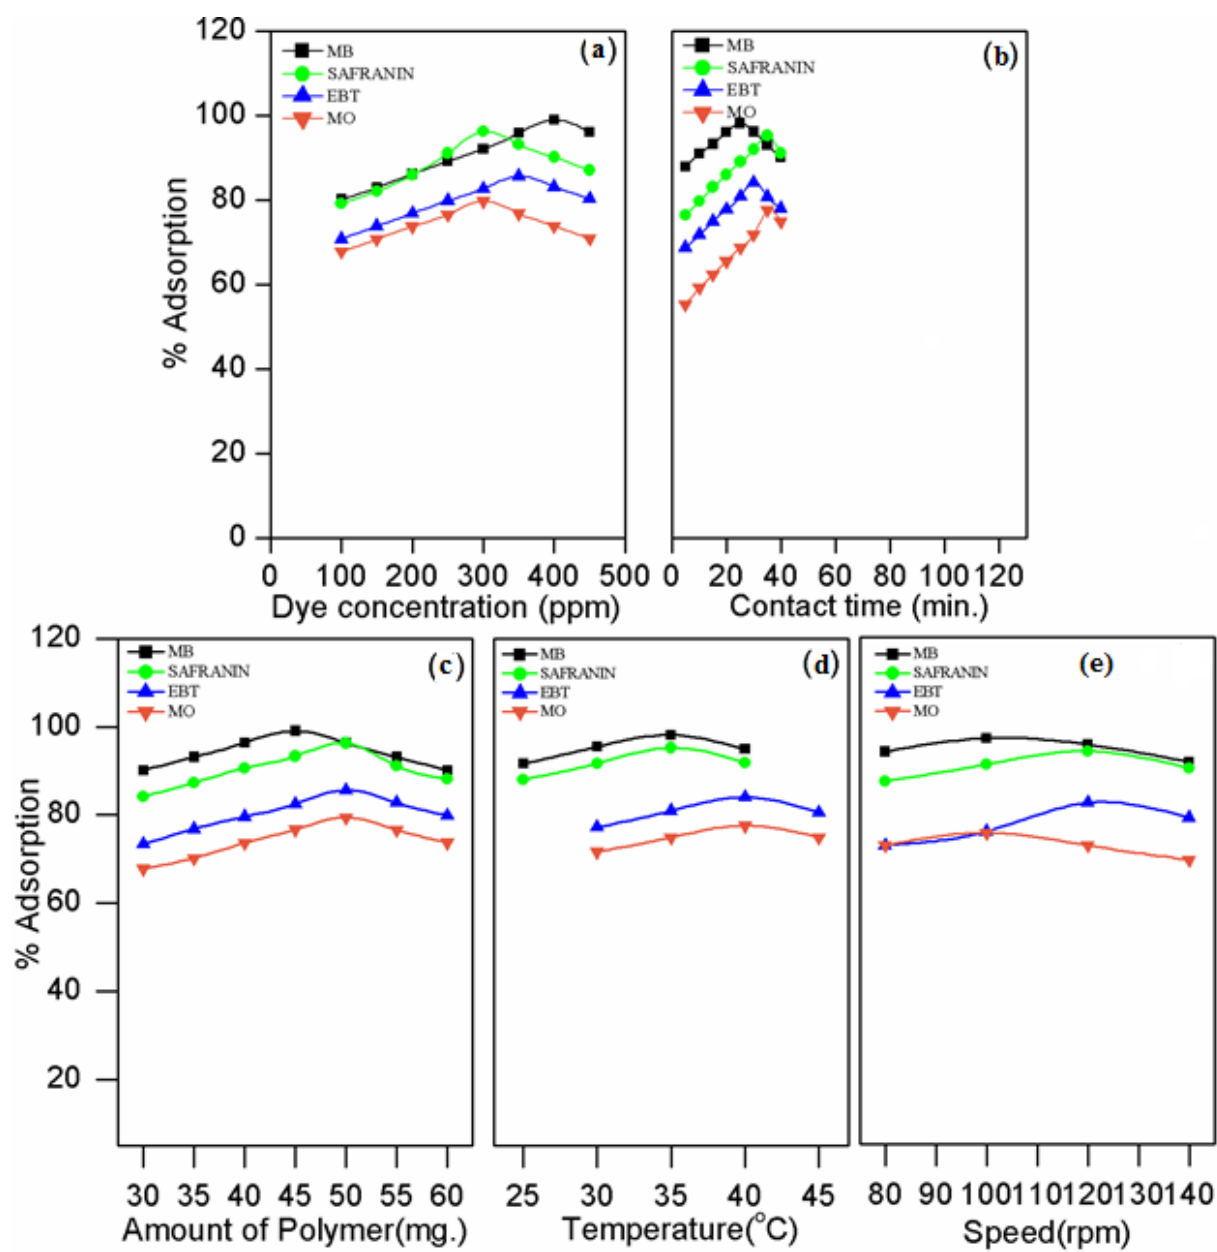

**Fig. S11:** Effect of (a) dye concentration (b) time, (c) polymer dosage, (d) temperature, (e) speed on % adsorption of various dyes.

### Adsorption Kinetics:

The kinetic mechanism was determined using pseudo-first-order, pseudo-second-order and second order models.

The linear form of the pseudo-first order kinetics model is <sup>6</sup>

$$\log(q_e - q_t) = \log q_e - \frac{K_1}{2.303} t \dots \dots \dots (1)$$

Where  $q_e$  and  $q_t$  (mg/g) refer to the amount of dyes adsorbed at equilibrium and time  $t$  (min), respectively,  $k_1$  (min<sup>-1</sup>) is the rate constant. Fig. S12e-h shows the  $\log(q_e - q_t)$  vs.  $t$  plot for the pseudo-first order and the parameters  $k_1$ ,  $q_e$  and the correlation coefficient ( $R^2$ ) are reported in Table S3.

The second model is pseudo-second order <sup>7</sup>

$$\frac{t}{q_t} = \frac{1}{K_2 q_e^2} + \frac{t}{q_e} \dots \dots \dots (2)$$

Where  $k_2$  is the pseudo-second order rate constant (g mg<sup>-1</sup> min<sup>-1</sup>). Fig. S12 a-d represents the  $t/q_t$  vs.  $t$  plot for pseudo-second order and the parameters  $k_2$ ,  $q_e$  and  $R^2$  values are listed in Table S3.

The third model is the second-order rate equation and is represented as <sup>8</sup>

$$\frac{1}{(q_e - q_t)} = \frac{1}{q_e} + K_3 t \dots \dots \dots (3)$$

Where  $k_3$  is the second order rate constant (g mg<sup>-1</sup> min<sup>-1</sup>), Fig. S12 (i-l) shows  $1/(q_e - q_t)$  vs.  $t$  plot for the second order and the parameters  $k_3$ ,  $q_e$  and  $R^2$  are listed in Table S3.

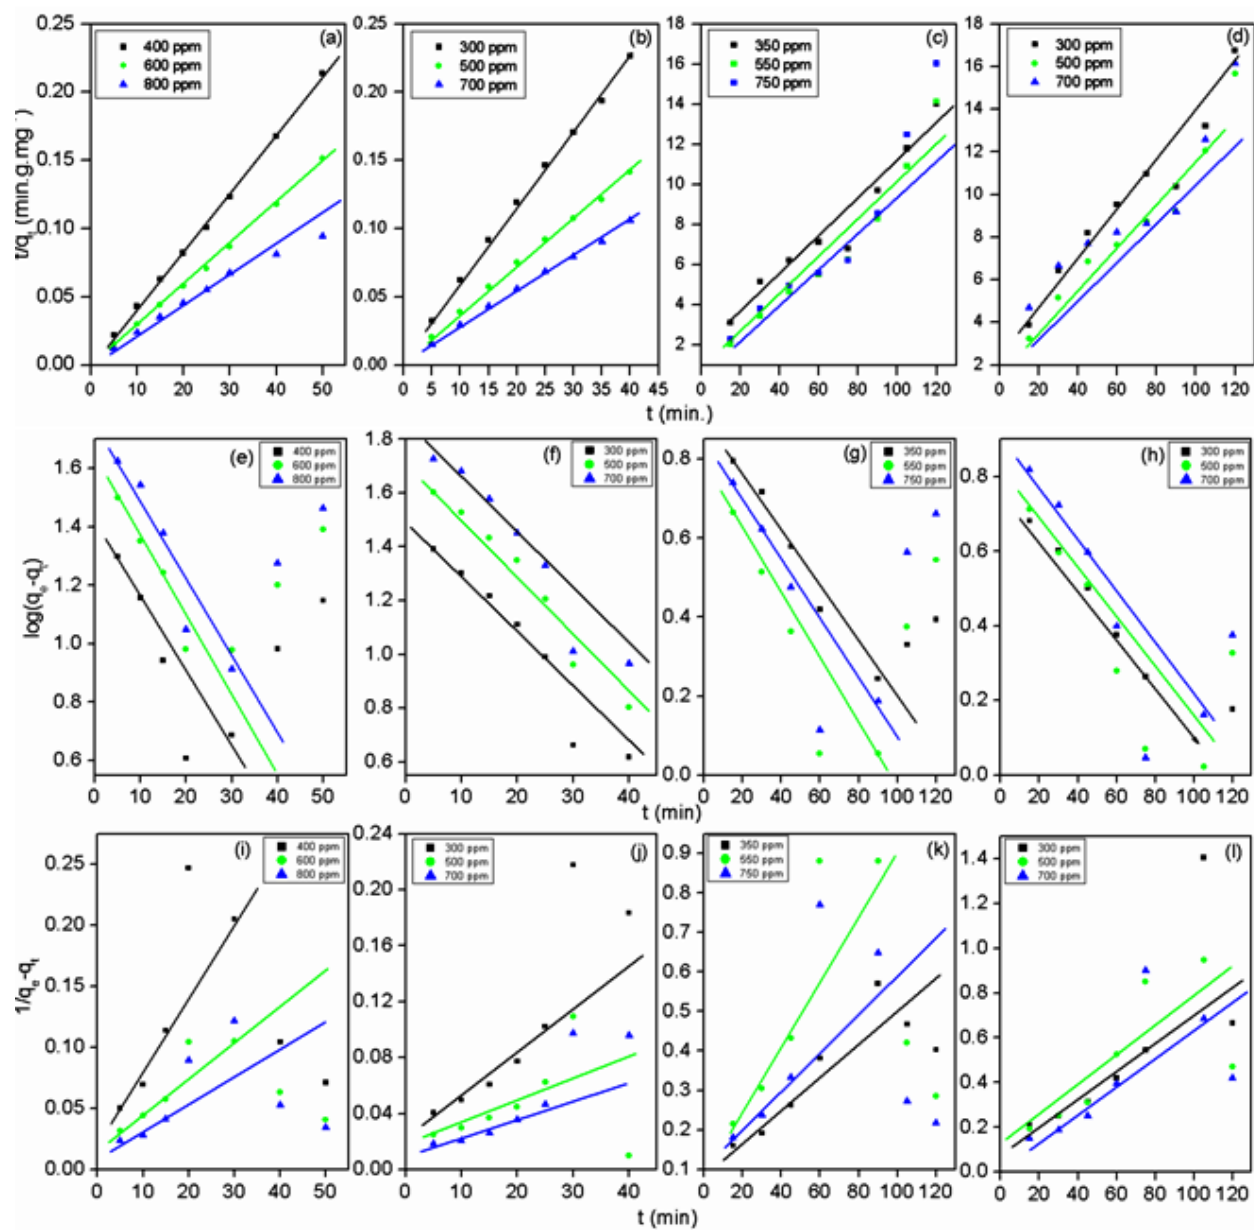

**Fig. S12:** Kinetics modeling of pseudo-second order model of (a) MB, (b) Safranin, (c) EBT, (d) MO, Pseudo-first order model of (e) MB, (f) Safranin, (g) EBT, (h) MO and second order model of (i) MB, (j) Safranin, (k) EBT, (l) MO using g-TKP/pMA-18adsorbent.

**Table S3.** Kinetics parameters for adsorption of various dyes using g-TKP/pMA adsorbent

| Dye | Conc.<br>(ppm) | Pseudo -first order            |                                 |        | Pseudo-second order                            |                                 |        | Second order                                   |                                 |        |
|-----|----------------|--------------------------------|---------------------------------|--------|------------------------------------------------|---------------------------------|--------|------------------------------------------------|---------------------------------|--------|
|     |                | $K_1$<br>( $\text{min}^{-1}$ ) | $q_e$<br>( $\text{mg.g}^{-1}$ ) | $R^2$  | $K_2$<br>( $\text{g.mg}^{-1}\text{min}^{-1}$ ) | $q_e$<br>( $\text{mg.g}^{-1}$ ) | $R^2$  | $K_3$<br>( $\text{g.mg}^{-1}\text{min}^{-1}$ ) | $q_e$<br>( $\text{mg.g}^{-1}$ ) | $R^2$  |
| MB  | 400            | 0.0057                         | 50.856                          | 0.6238 | 0.0133                                         | 235.84                          | 0.9983 | 0.0034                                         | 28.71                           | 0.4936 |
|     | 600            | 0.0053                         | 59.579                          | 0.5654 | 0.0081                                         | 334.44                          | 0.9977 | 0.0025                                         | 37.39                           | 0.4738 |
|     | 800            | 0.0045                         | 62.584                          | 0.5387 | 0.0078                                         | 442.90                          | 0.9967 | 0.0019                                         | 45.90                           | 0.4627 |
| SF  | 300            | 0.0561                         | 45.253                          | 0.5625 | 0.0037                                         | 183.82                          | 0.9982 | 0.0058                                         | 35.72                           | 0.3163 |
|     | 500            | 0.0559                         | 52.261                          | 0.4815 | 0.0022                                         | 294.11                          | 0.9970 | 0.0054                                         | 42.31                           | 0.2798 |
|     | 700            | 0.0549                         | 60.326                          | 0.4381 | 0.0016                                         | 393.70                          | 0.9958 | 0.0051                                         | 48.85                           | 0.2231 |
| EBT | 350            | 0.0004                         | 46.271                          | 0.4842 | 0.0057                                         | 210.34                          | 0.9273 | 0.0031                                         | 23.24                           | 0.4371 |
|     | 550            | 0.0039                         | 57.453                          | 0.4564 | 0.0042                                         | 261.35                          | 0.9228 | 0.0016                                         | 30.17                           | 0.4250 |
|     | 750            | 0.0024                         | 62.432                          | 0.4324 | 0.0028                                         | 274.41                          | 0.8794 | 0.0007                                         | 41.04                           | 0.3998 |
| MO  | 300            | 0.0152                         | 35.563                          | 0.4106 | 0.0038                                         | 192.55                          | 0.9070 | 0.0082                                         | 25.84                           | 0.3373 |
|     | 500            | 0.0131                         | 37.453                          | 0.3738 | 0.0032                                         | 199.77                          | 0.8951 | 0.0053                                         | 27.32                           | 0.3202 |
|     | 700            | 0.0121                         | 39.864                          | 0.3675 | 0.0027                                         | 210.96                          | 0.8474 | 0.0045                                         | 31.30                           | 0.2972 |

### Adsorption isotherm:

The linear form of Langmuir isotherm is given by the following equation<sup>9</sup>

$$\frac{C_e}{q_e} = \frac{1}{b \cdot Q_0} + \frac{C_e}{Q_0} \text{-----} (4)$$

Where  $C_e$  is the equilibrium concentration of adsorbate ( $\text{mg}\cdot\text{L}^{-1}$ ),  $q_e$  is the amount of dyes adsorbed by the adsorbent at equilibrium ( $\text{mg}\cdot\text{g}^{-1}$ ), the Langmuir constant  $Q_0$  ( $\text{mg}\cdot\text{g}^{-1}$ ) represents the monolayer adsorption capacity and  $b$  ( $\text{L}\cdot\text{mg}^{-1}$ ) represents the heat of adsorption. Fig. S13a-d shows the linear plot  $C_e/q_e$  against  $C_e$  for Langmuir isotherm and the parameters  $Q_0$ ,  $b$  and  $R^2$  are listed in Table S4.

The feasibility of the adsorption process is determined using separation factor ( $R_L$ ), which is defined by following equation<sup>10</sup>

$$R_L = \frac{1}{1 + bC_0} \text{-----} (5)$$

Where  $b$  = Langmuir constant and  $C_0$ = initial concentration of various dyes. The value of  $R_L$  indicates the category of the isotherm to be either unfavorable ( $R_L > 1$ ), linear ( $R_L = 1$ ), irreversible ( $R_L = 0$ ) or favorable ( $0 < R_L < 1$ ).

The Freundlich isotherm is given by the following equation<sup>11</sup>

$$q_e = K_f \cdot C_e^{1/n} \text{-----} (6)$$

Where  $K_f$  ( $\text{mg}\cdot\text{g}^{-1}$ ) and  $n$  are Freundlich constants related to the capacity and favorability of sorption respectively. Fig. S13e-h represents the linear plots of  $\ln q_e$  vs.  $\ln C_e$  for Freundlich isotherm and the parameters  $n$ ,  $K_f$  and  $R^2$  are listed in Table S4. It is noted that greater is the  $n$  value, better is the favorability of the adsorption and the monolayer adsorption capacity ( $Q_{\text{max}}$ ) of

g-TKP/pMA was found to be extremely high for MB (571.42mg/g) at 308K. It has also been shown that the  $R_L$  (separation factor) <sup>12</sup> values is in between 0 to 1, which signifies that the adsorption process is favorable. Also, with increase in temperature, the Langmuir constant (b) was found to be increased (Table S4) which indicates the stronger attraction between the active sites of the adsorbent and adsorbate as well as the higher affinity of adsorbent and adsorbate molecules at higher temperature in contrast to lower temperature.<sup>10</sup>

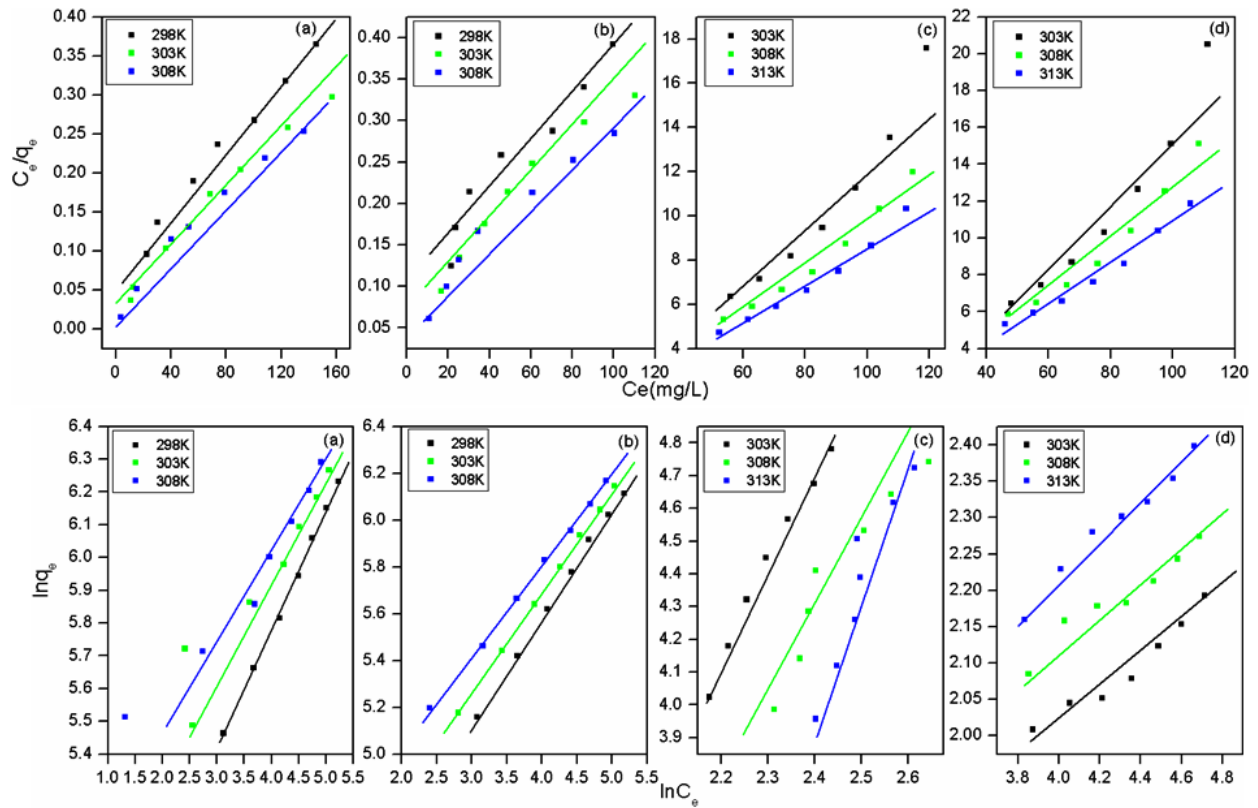

**Fig. S13:** Langmuir isotherm model for (a) MB, (b) Safranin, (c) EBT and (d) MO and Freundlich isotherm model for (e) MB, (f) Safranin, (g) EBT and (h) MO using g-TKP/pMA



**Table S4:** Parameters for Langmuir and Freundlich isotherm for various dyes adsorption.

| Dyes | Temp. (K) | Langmuir model                      |                            |        | Freundlich model            |      |        |
|------|-----------|-------------------------------------|----------------------------|--------|-----------------------------|------|--------|
|      |           | $Q_{\max}$<br>(mg.g <sup>-1</sup> ) | b<br>(L.mg <sup>-1</sup> ) | $R^2$  | $K_f$ (mg.g <sup>-1</sup> ) | n    | $R^2$  |
| MB   | 298K      | 485.43                              | 0.0307                     | 0.9841 | 74.48                       | 2.72 | 0.8977 |
|      | 303K      | 568.18                              | 0.0410                     | 0.9862 | 146.68                      | 4.06 | 0.9456 |
|      | 308K      | 571.42                              | 0.0628                     | 0.9932 | 175.38                      | 4.64 | 0.9754 |
| SF   | 298K      | 347.22                              | 0.0288                     | 0.9634 | 42.09                       | 2.16 | 0.8734 |
|      | 303K      | 400.00                              | 0.0330                     | 0.9734 | 51.80                       | 2.95 | 0.9280 |
|      | 308K      | 421.94                              | 0.0389                     | 0.9837 | 70.63                       | 2.98 | 0.9473 |
| EBT  | 303K      | 435.47                              | 0.0407                     | 0.9309 | 57.92                       | 2.75 | 0.8290 |
|      | 308K      | 467.89                              | 0.0860                     | 0.9692 | 79.88                       | 2.85 | 0.8637 |
|      | 313K      | 481.34                              | 0.1255                     | 0.9796 | 81.23                       | 2.97 | 0.8941 |
| MO   | 303K      | 270.67                              | 0.0423                     | 0.9229 | 43.82                       | 2.56 | 0.7823 |
|      | 308K      | 298.89                              | 0.0795                     | 0.9569 | 54.71                       | 2.64 | 0.8336 |
|      | 313K      | 373.67                              | 0.1191                     | 0.9710 | 65.03                       | 2.77 | 0.8577 |

### Adsorption Thermodynamics:

The feasibility and spontaneity of the dyes uptake have been discussed using Van't Hoff's equation:

$$\ln b = \frac{\Delta S^{\circ}}{R} - \frac{\Delta H^{\circ}}{RT} \text{----- (7)}$$

$$\Delta G^{\circ} = \Delta H^{\circ} - T\Delta S^{\circ} \text{----- (8)}$$

Where  $\Delta G^{\circ}$  is the change in Gibbs free energy ( $\text{J. mol}^{-1}$ ),  $\Delta H^{\circ}$  is change in enthalpy ( $\text{J. mol}^{-1}$ ),  $\Delta S^{\circ}$  is the change in entropy ( $\text{J. mol}^{-1} \text{K}^{-1}$ ),  $R$  is universal gas constant ( $8.314 \text{ J. K}^{-1} \text{ mol}^{-1}$ ) and  $b$  is Langmuir constant at temperature  $T$  (K). Fig. S14a-d represents the plot of  $\ln b$  vs.  $1/T$  and thermodynamics parameters like  $\Delta G^{\circ}$ ,  $\Delta H^{\circ}$  and  $\Delta S^{\circ}$  has been reported in Table S5.

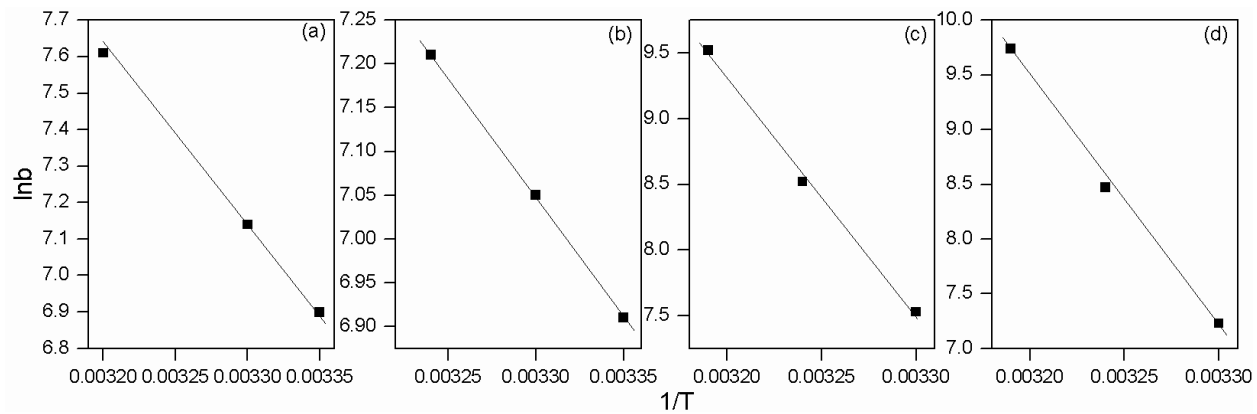

**Fig. S14:**  $\ln b$  vs.  $1/T$  plot for (a) MB (b) Safranin, (c) EBT, (d) MO, using g-TKP/pMA-18 adsorbent.

**Table S5:** Thermodynamic parameters for uptake of various dyes using g-TKP/pMA

| Dye | Temp. (K) | $\Delta G^\circ$ (KJ mol <sup>-1</sup> ) | $\Delta H^\circ$ (KJ mol <sup>-1</sup> ) | $\Delta S^\circ$ (KJ mol <sup>-1</sup> K <sup>-1</sup> ) |
|-----|-----------|------------------------------------------|------------------------------------------|----------------------------------------------------------|
|     | 298K      | -33.538                                  |                                          |                                                          |
| MB  | 303K      | -34.480                                  | 22.698                                   | 0.1887                                                   |
|     | 308K      | -35.424                                  |                                          |                                                          |
|     | 298K      | -17.066                                  |                                          |                                                          |
| SF  | 303K      | -17.732                                  | 22.657                                   | 0.1333                                                   |
|     | 308K      | -18.399                                  |                                          |                                                          |
|     | 303K      | -25.758                                  |                                          |                                                          |
| EBT | 308K      | -26.463                                  | 14.983                                   | 0.1410                                                   |
|     | 313K      | -27.168                                  |                                          |                                                          |
|     | 303K      | -15.050                                  |                                          |                                                          |
| MO  | 308K      | -15.609                                  | 18.825                                   | 0.1118                                                   |
|     | 313K      | -17.895                                  |                                          |                                                          |

***Desorption study:***

The graft copolymer (g-TKP/pMA) shows excellent regeneration characteristics, which reduce the overall cost of the adsorbent. Maximum % desorption was obtained in acidic medium for cationic dyes (pH 2: 96.89 % for MB, 94.12 % for Safranin) and basic medium for anionic dyes (pH 9: 95.34 % for EBT and 86.34 % for MO). Besides, the minimum % of desorption was observed at basic condition for MB and Safranin dyes (pH 9: 40.47% for MB, 38.32% for Safranin) and that of 37.56 % for EBT and 32.37% for MO at acidic environment. The dye desorption process follows ion exchange mechanism<sup>12, 13</sup> which has been depicted in Fig. S15.



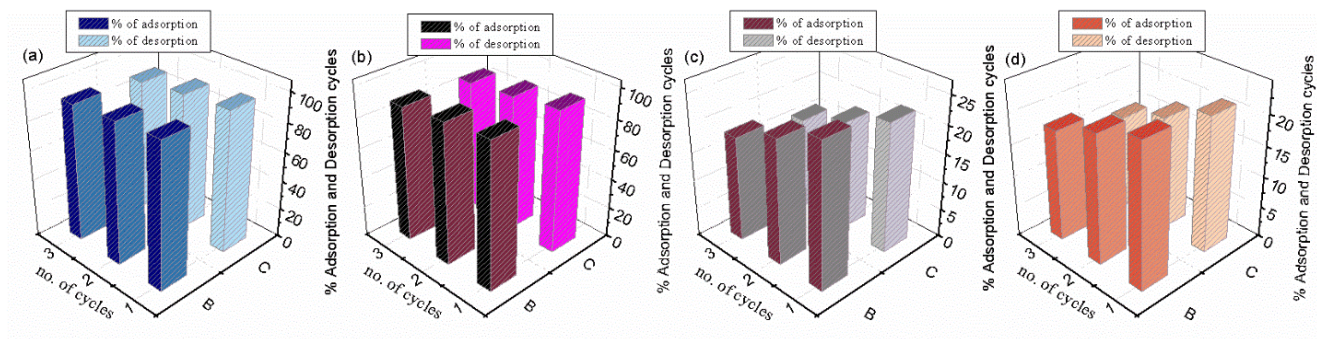

**Fig. S16:** Adsorption-desorption cycles of (a) MB (b) SF (c) EBT and (d) MO dyes.

**Table S6.** Comparison of maximum adsorption capacity of g-TKP/pMA with other reported adsorbents for removal of MB and EBT dye from aqueous environment.

| Adsorbent                                                                                 | Adsorption capacity for removal of MB ( $Q_{max}$ ) (mg. g <sup>-1</sup> ) | Reference            | Adsorbent                                               | Adsorption capacity for removal of EBT ( $Q_{max}$ ) (mg. g <sup>-1</sup> ) | Reference            |
|-------------------------------------------------------------------------------------------|----------------------------------------------------------------------------|----------------------|---------------------------------------------------------|-----------------------------------------------------------------------------|----------------------|
| Polyaniline NanotubesBase                                                                 | 8.21                                                                       | [10]                 | Activated carbon                                        | 160.36                                                                      | [24]                 |
| Activated carbon coated palygorskite                                                      | 351                                                                        | [14]                 | eucalyptus bark                                         | 136.7                                                                       | [25]                 |
| pyrolytic tire char                                                                       | 65.81                                                                      | [15]                 | NiFe <sub>2</sub> O <sub>4</sub> magnetic Nanoparticles | 47.0                                                                        | [26]                 |
| Diatomite treated with sodium hydroxide                                                   | 27.86                                                                      | [16]                 | Modified Kaolin Clay and Talc                           | 109.0                                                                       | [27]                 |
| Boron-doped diamond (BDD) electrode                                                       | 33.57                                                                      | [17]                 | Activated Nilgiri leaves                                | 33.33                                                                       | [28]                 |
| Nitric acid modification of activated carbon                                              | 480.4                                                                      | [18]                 | MnO <sub>2</sub> -Coated Zeolite                        | 12.35                                                                       | [29]                 |
| Natural palygorskite modification by introducing sodium silicate and magnesium salts      | 527.22                                                                     | [19]                 | Bentonite                                               | 11.51                                                                       | [30]                 |
| $\gamma$ -Al <sub>2</sub> O <sub>3</sub> nano-structured hierarchical hollow microspheres | 8.38                                                                       | [20]                 | Carbon Composite Material                               |                                                                             |                      |
| Dodecyl sulfobetaine surfactant-modified montmorillonite                                  | 254.0                                                                      | [21]                 | Modification of Activated Carbon                        | 158.73                                                                      | [31]                 |
| Polydopamine microspheres                                                                 | 90.7                                                                       | [22]                 | Bioaugmented Aerobic Granules                           | 200                                                                         | [32]                 |
| Modified natural palygorskite                                                             | 158.03                                                                     | [23]                 | Scolymus Hispanicus L.                                  | 165.77                                                                      | [32]                 |
| <b>g-TKP/pMA-18</b>                                                                       | 571.42                                                                     | <b>Present study</b> | <b>g-TKP/pMA-18</b>                                     | 481.34                                                                      | <b>Present study</b> |



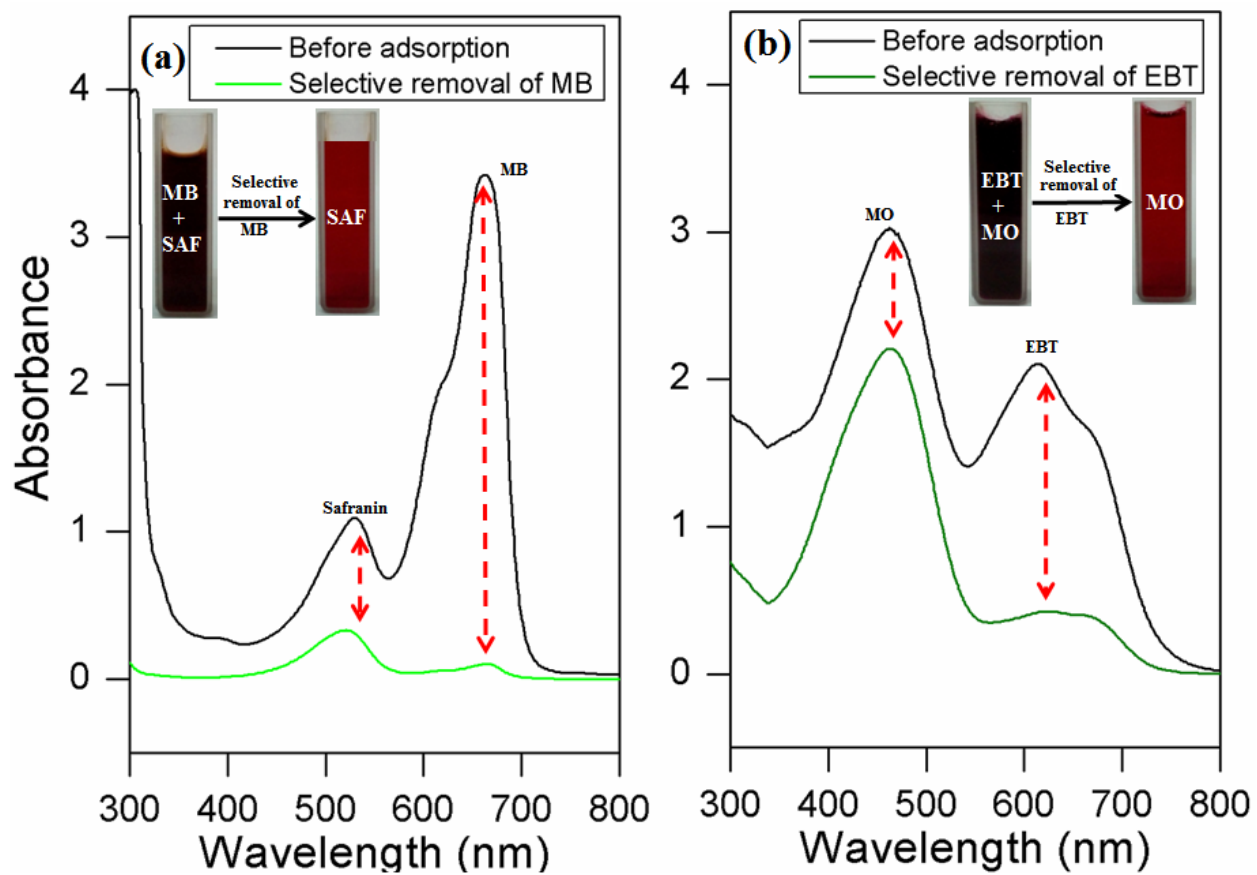

**Fig. S17:** UV-Vis spectra of mixed (a) cationic and (b) anionic dyes solution before and after adsorption treatment.

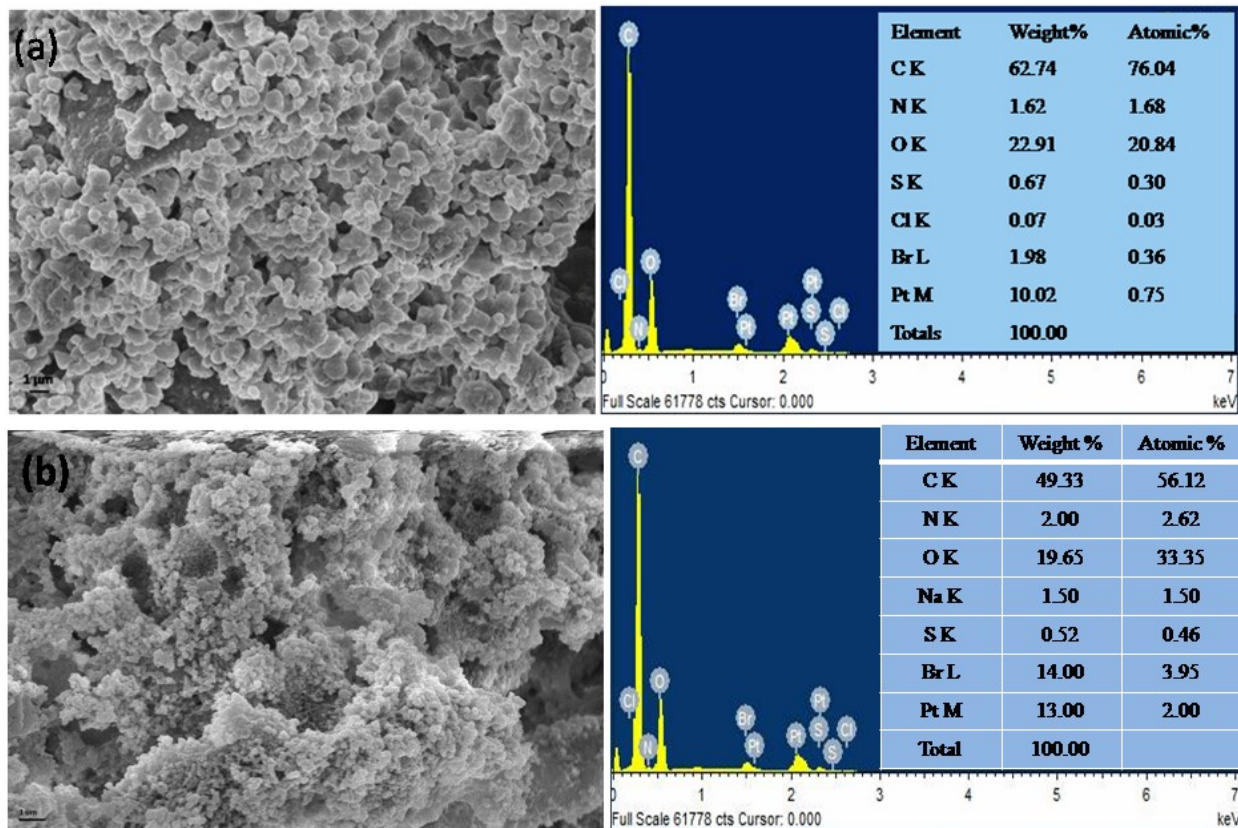

**Fig. S18:** FESEM and EDAX of g-TKP/pMA-18 loaded (a) MB and (b) EBT.

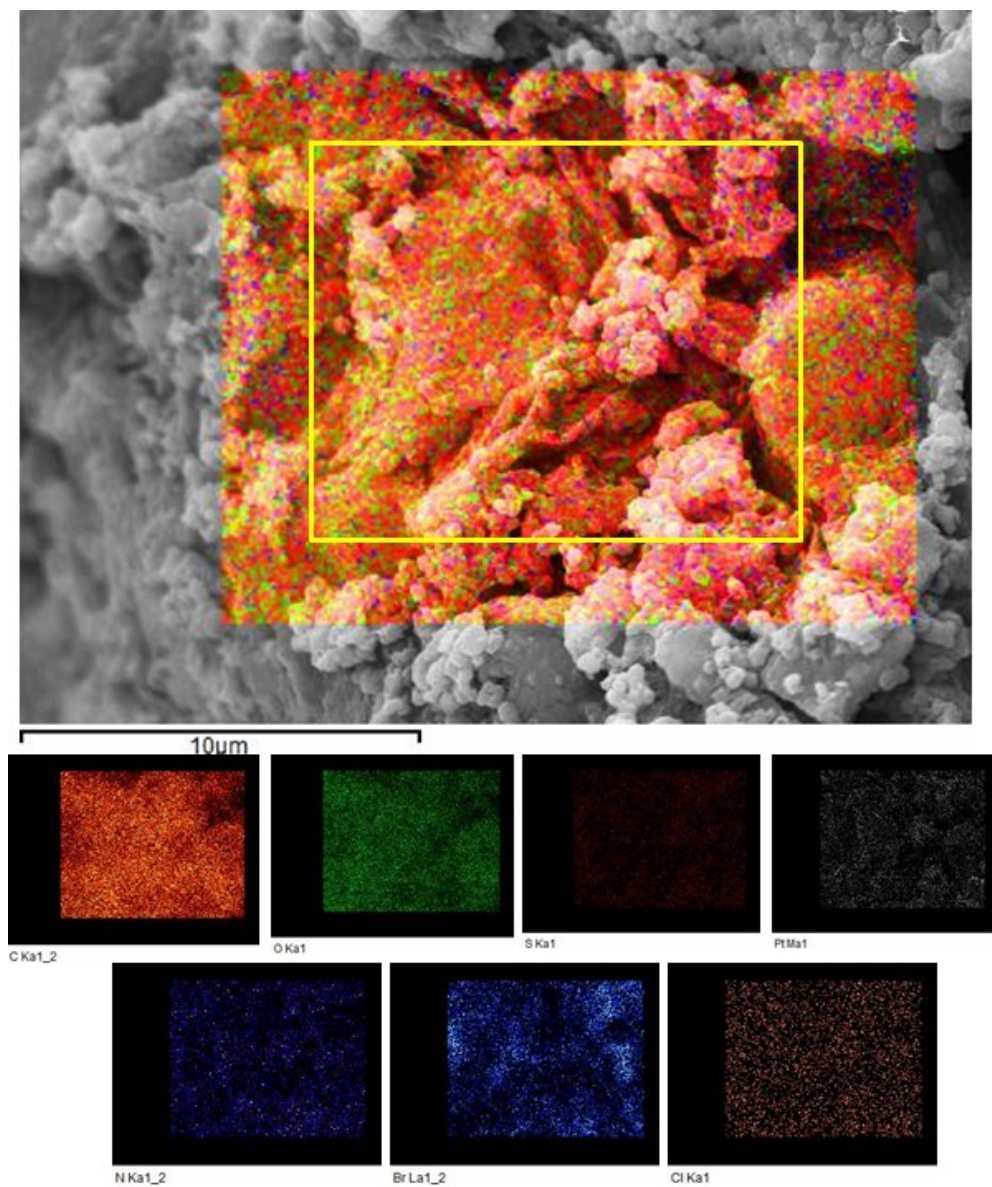

**Fig. S19:** Elemental mapping of g-TKP/pMA-18 loaded MB dye.

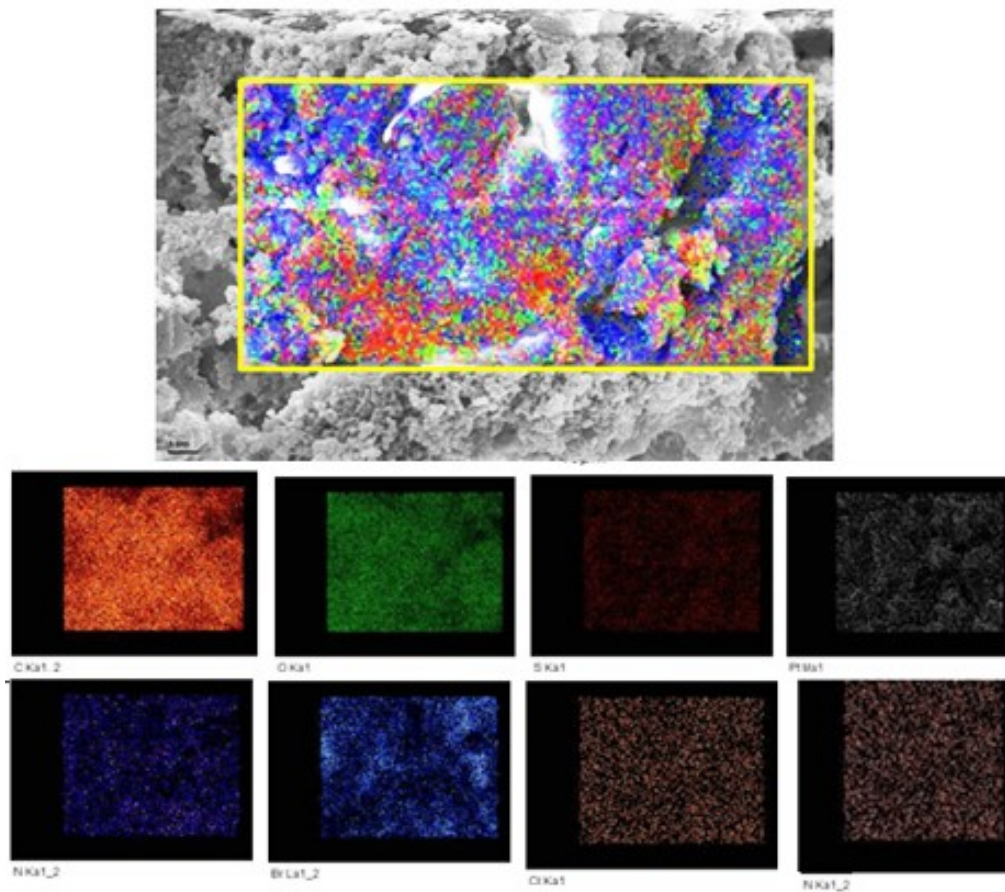

**Fig. S20:** Elemental mapping of g-TKP/pMA-18 loaded EBT.

**Table S7:** Characteristics FTIR spectra peaks of g-TKP/pMA-18, MB and EBT adsorbed g-TKP/pMA-18

| Characteristics peaks                  | g-TKP/pMA( $\text{cm}^{-1}$ ) | MB adsorbed                   | EBT adsorbed                  |
|----------------------------------------|-------------------------------|-------------------------------|-------------------------------|
|                                        |                               | g-TKP/pMA( $\text{cm}^{-1}$ ) | g-TKP/pMA( $\text{cm}^{-1}$ ) |
| -OH stretching                         | 3418                          | 3389                          | 3408                          |
| C-H stretching                         | 2926                          | 2923                          | 2921                          |
| COO <sup>-</sup> asymmetric stretching | 1538                          | 1530                          | 1518                          |
| COO <sup>-</sup> symmetric stretching  | 1458                          | 1438                          | 1432                          |
| -OH bending vibration                  | 1388                          | 1378                          | 1376                          |
| C-Br stretching                        | 625                           | 614                           | 603                           |

## References:

- (1) K. K. Singh, M. Talat and S. H. Hasan, *Bioresour. Technol.*, 2006, **97**, 2124–2130.
- (2) S. Ghorai, A. K. Sarkar and S. Pal, *Bioresour. Technol.* 2014, **170**, 578–582.
- (3) L. Wang, J. Zhang and A. Wang, *Desalination*, 2011, **266**, 33–39.
- (4) D. Lua, Q. Cao, X. Cao and F. Luo, *J. Hazard. Mater.*, 2009, **166**, 239–247.
- (5) V. K. Gupta and Suhas, *J. Environ. Manage.*, 2009, **90**, 2313–2342.
- (6) S. Legergren, *K. Svenska Vetenskapsakad. Handl.*, 1898, **24**, 1–39.
- (7) Y. S. Ho and G. McKay, *Process Biochem.*, 1999, **34**, 451–465.
- (8) Y. S. Ho, *Water Res.*, 2006, **40**, 119 – 125.
- (9) I. Langmuir, *J. Am. Chem. Soc.*, 1916, **38**, 2221–2295.
- (10) M. M. Ayad and A. A. El-Nasr, *J. Phys. Chem. C* 2010, **114**, 14377–14383.
- (11) H. M. F. Freundlich, *Z. Phys. Chem.*, 1906, **57**, 385–470.
- (12) A. Pal, D. Das, A. K. Sarkar, S. Ghorai, R. Das and S. Pal, *Eur. Polym. J.*, 2015, **66**, 33–46.
- (13) A. Heidaria, H. Younesia, Z. Mehrabanb and H. Heikkinen, *Int. J. Biol. Macromol.*, 2013, **61**, 251– 263.
- (14) X. Zhang, L. Cheng, X. Wu, Y. Tang and Y. Wu, *J. Environ. Sci.*, 2015, **33**, 97-105.
- (15) V. Makrigianni, A. Giannakas, Y. Deligiannakis and I. Konstantinou, *J. Environ. Chem. Eng.*, 2015, **3**, 574–582.
- (16) Z. Jian, P. Qingwei, N. Meihong, S. Haiqiang and L. Na, *Appl. Clay Sci.*, 2013, **83–84**, 12–16.
- (17) H. Akrouf, S. Jellali and L. Bousselmi, *C. R. Chimie.*, 2015, **18**, 110–120.
- (18) Y. Gokce and Z. Aktas, *Appl. Sur. Sci.*, 2014, **313**, 352–359.
- (19) W. Wang, G. Tian, Z. Zhang, A. Wang, *Chem. Eng. J.*, 2015, **265**, 228–238.

- (20) J. Fang, X. Huang, X. Ouyang and X. Wang, *Chem. Eng. J.*, 2015, **270**, 309–319.
- (21) H. Fan, L. Zhou, X. Jiang, Q. Huang and W. Lang, *Appl. Clay Sci.*, 2014, **95**, 150–158.
- (22) J. Fu, Z. Chen, M. Wang, S. Liu, J. Zhang, J. Zhang, R. Han and Q. Xu, *Chem. Eng. J.*, 2015, **259**, 53–61.
- (23) Y. Zhang, W. Wang, J. Zhang, P. Liu and A. Wang, *Chem. Eng. J.*, 2015, **262**, 390–398.
- (24) M. Daniel, G. D. Luna, E. D. Floresb, D. Angela, D. Genuino, C. M. Futralan and M. W. Wan, *J. Taiwan Inst. Chem. Eng.*, 2013, **44**, 646–653.
- (25) P. N. Davea, S. Kaurb and E. Khosla, *Ind. J. Chem. Technol.*, 2011, **18**, 53-60.
- (26) F. Moeinpour, A. Alimoradi and M. Kazemi, *J. Environ. Health Sci. Eng.*, 2014, **12**, 112.
- (27) H. J. Sonba and S. H. Ridha, *Acta Chim. Pharm. Indica.*, 2014, **4**, 111-118.
- (28) U. V. Ladhe, S. K. Wankhede, V. T. Patil and P. R. Patil, *J. Chem. Pharm. Res.*, 2011, **3**, 670-675.
- (29) D. Marie, M. Aguila and M. V. Ligaray, *Inter. J. Environ. Sci. Dev.*, 2015, **6**, 824-827.
- (30) F. M. S. E. El-Dars, H. M. Ibrahim, H. A. Farag, M. Z. BAbdelwahhab and M. E. H. Shalabi, *Inter. J. Sci. Eng. Res.*, 2015, **6**, 679-688.
- (31) E. Alzahrani, *Inter. J. Recent Technol. Eng.*, 2014, **3**, 6-10.
- (32) W. Hailei, L. Pinga, L. Guoshenga, L. Xina, Y. Jianming, *Enzyme Microb. Tech.*, 2010, **47**, 37–43.
